# Supplementary figures and images for: Multilayer approach reveals organizational principles disrupted in breast cancer co-expression networks
Source: Springer Nature journal article supplement (doi:10.1007/s41109-020-00291-1), 2020-08-05

## Hubs

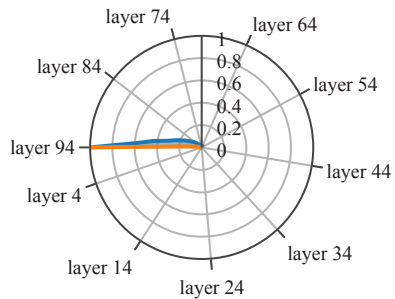

## Core

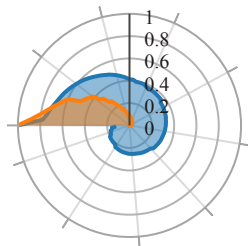

## Control core

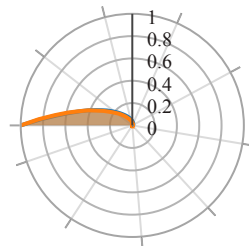

Healthy Basal

Supplement: MOESM1 [file 18252418]
